# Supplementary material for: Validation by SSRs of Morphometric Markers for Genetic Variability in Araucaria araucana (Molina) K. Koch
Source: MDPI journal article supplement (doi:10.3390/f14030466), 2023-02-24
Supplement: s1 [file s1]

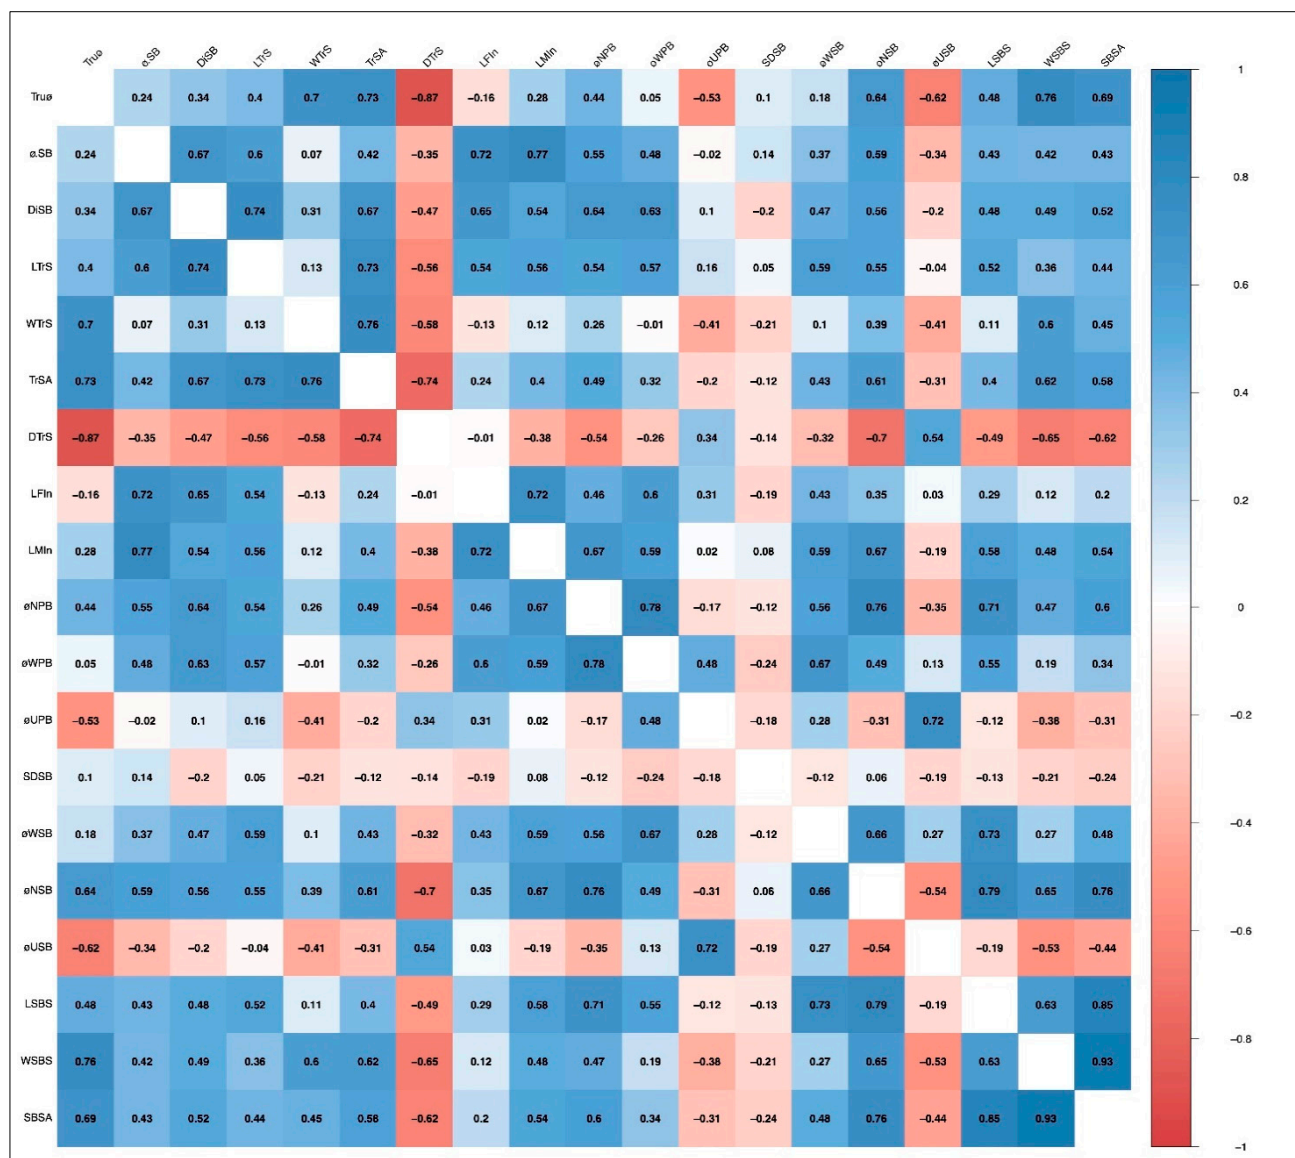

**Figure S1.** Pearson correlation coefficient ( $r$ ) matrix and heatmap for the 19 considered quantitative morphological traits.

**Table S1.** Number of alleles detected for each SSR locus.

| SSR name | GenBank accession | Detected alleles (n) |
|----------|-------------------|----------------------|
| Aang01   | AY865575          | 7.00                 |
| Aang03   | AY865577          | 2.00                 |
| Aang07   | AY865579          | 1.00*                |
| Aang12   | AY865581          | 1.00*                |
| Aang14   | AY865583          | 1.00*                |
| Aang18   | AY865586          | 1.00*                |
| Aang21   | AY865587          | 1.00*                |
| Aang22   | AY865588          | 1.00*                |
| Aang24   | AY865590          | 2.00                 |
| Aang27   | AY865591          | 1.00*                |
| Aang28   | AY865592          | 2.00                 |
| Aang35   | AY865594          | 3.00                 |
| Aang37   | AY865596          | 1.00*                |
| Aang45   | AY865601          | 2.00                 |
| Aang46   | AY865602          | 5.00                 |
| Aang47   | AY865603          | 2.00                 |
| Ag20     | AJ749964          | 4.00                 |
| Ag45     | AJ749966          | 3.00                 |
| Ag56     | AJ749967          | 3.00                 |
| Ag62     | AJ749968          | 2.00                 |
| Ara11382 | JN896697          | 2.00                 |
| Ara11384 | JN896698          | 3.00                 |
| Ara2027  | JN896693          | 7.00                 |
| Ara20681 | JN896699          | 3.00                 |
| Ara5179  | JN896694          | 1.00*                |
| Ara5182  | JN896695          | 2.00                 |
| Ara5595  | JN896696          | 2.00                 |
| CRCAC2   | AF522867          | 2.00                 |

\* Monomorphic SSR markers discarded for statistical analyses.

**Table S2.** Pairwise  $F_{ST}$  among each population (p-value<0.001).

|     | NLU   | ARG   | UNK   | ESU   | ITM   | ITV   |
|-----|-------|-------|-------|-------|-------|-------|
| NLU | 0.000 |       |       |       |       |       |
| ARG | 0.465 | 0.000 |       |       |       |       |
| UNK | 0.383 | 0.343 | 0.000 |       |       |       |
| ESU | 0.419 | 0.497 | 0.400 | 0.000 |       |       |
| ITM | 0.403 | 0.408 | 0.380 | 0.460 | 0.000 |       |
| ITV | 0.377 | 0.349 | 0.285 | 0.387 | 0.003 | 0.000 |
